# Supplementary material
Source: ML conference proceedings conference paper supplement (https://openaccess.thecvf.com/content/CVPR_2019/html/Chen_Selective_Sensor_Fusion_CVPR_2019_paper.html)
Supplement: Supplementary file 1 [file Chen_Selective_Sensor_Fusion_CVPR_2019_supplemental.pdf]

# Supplementary Material

## Abstract

*In this supplementary document we provide additional implementation details, including the detailed network architecture, and data preparation/training details. We also provide additional results and discussion on predicted global trajectories.*

## 1. Network Architecture

The implementation details for the architecture that was used in our experiments are reported in Table 1. We use the following abbreviations:

**Conv**: convolution, **FC**: fully-connected, **activ.**: activation function,  $\oplus$ : concatenation;  $\odot$ : element-wise multiplication;  $B$ : batch size.

The visual encoder follows the encoder structure of the FlowNetS architecture [3]. We initialize the visual encoder weights with the weights of a model that was pre-trained on the FlyingChairs dataset<sup>1</sup>, since training from scratch would require larger amounts of data compared to our dataset sizes. For this reason, training the encoder from scratch experimentally gave worse results.

Bi-directional LSTMs were used for the inertial encoder (as in [2]) as well as in the recurrent part of the pose regressor. Bi-directional RNNs provide higher data efficiency when dealing with small datasets. The LSTM layers include dropout regularization on the recurrent connections.

## 2. Dataset Preprocessing Details

Few publicly available datasets provide camera images, high-frequency IMU and ground-truth for training visual inertial odometry (i.e., inertial data is missing in the Oxford Robotcar Dataset [5] and 7-Scenes Dataset [9]; ground-truth for the full trajectories is not available in TUM VIO [8]). Therefore, we use the KITTI [4], EuRoC [1], and PennCOSYVIO [7] datasets for training and evaluation.

**KITTI** High-frequency inertial data (100Hz) is only available in the raw unsynced data packages. Hence, we manually synchronize inertial data and images according to

their timestamps. We used Sequences 00, 01, 02, 04, 06, 08, 09 for training and tested the network on Sequences 05, 07, and 10, excluding sequence 03 as the corresponding raw file is unavailable. Correspondences between the KITTI Odometry Number, the raw data file names and the corresponding number of sequences are reported in Table 2. The images are resized to  $512 \times 256$ .

**EuRoC** For the EuRoC MAV dataset [1] we use grayscale video images from CAM1 at 20fps of the VI-Sensor and the IMU measurements from the same sensors at 200Hz. The data is tightly synchronized. Doubling the sensor rates compared to the ones in KITTI helps to deal with the faster, jerky MAV movements. As with KITTI, images are resized to  $512 \times 256$ . We train on all sequences, minus *MH\_04\_difficult*, which is used for testing.

**PennCOSYVIO** A number of sensors are included in the PennCOSYVIO dataset [7]. For our experiment we select the video images from the Tango Bottom camera, running at 30fps, and inertial measurements from the VI-Sensor, running at 200Hz. Images are subsampled to 10Hz, and IMU measurements are subsampled to 100Hz, similarly to KITTI. Images are cropped and resized to  $512 \times 256$ . We train on sequences *as*, *bf*, *bs* and test on sequence *af*. Small time-synchronization errors between the Tango camera and the VI-Sensor are likely present in the data, leading to worse results in all scenarios.

## 3. Evaluation of global trajectories on KITTI

Figure 1 shows the global RMSE position errors on the three test KITTI trajectories (Seq 05, Seq 07, Seq 10) as a function of travelled distance, for both the normal dataset and the fully degraded dataset (visual degradation + sensor degradation). We compare the two VO and vanilla VIO baselines with the proposed soft and hard fusion strategies. It can be noticed how, while at start VIO performs as well as soft and hard fusion, on average, over time the proposed selective fusion strategies outperform the vanilla fusion, since the increased robustness reduces error accumulation. This is particularly visible in the most challenging Seq 05. As expected, a VO approach heavily underperforms in presence of large amounts of angular rotations (Seq 05, Seq 07).

Another interesting result is how VO performs slightly better in presence of IMU degradation and camera-IMU

<sup>1</sup><https://lmb.informatik.uni-freiburg.de/resources/datasets/FlyingChairs.en.html>

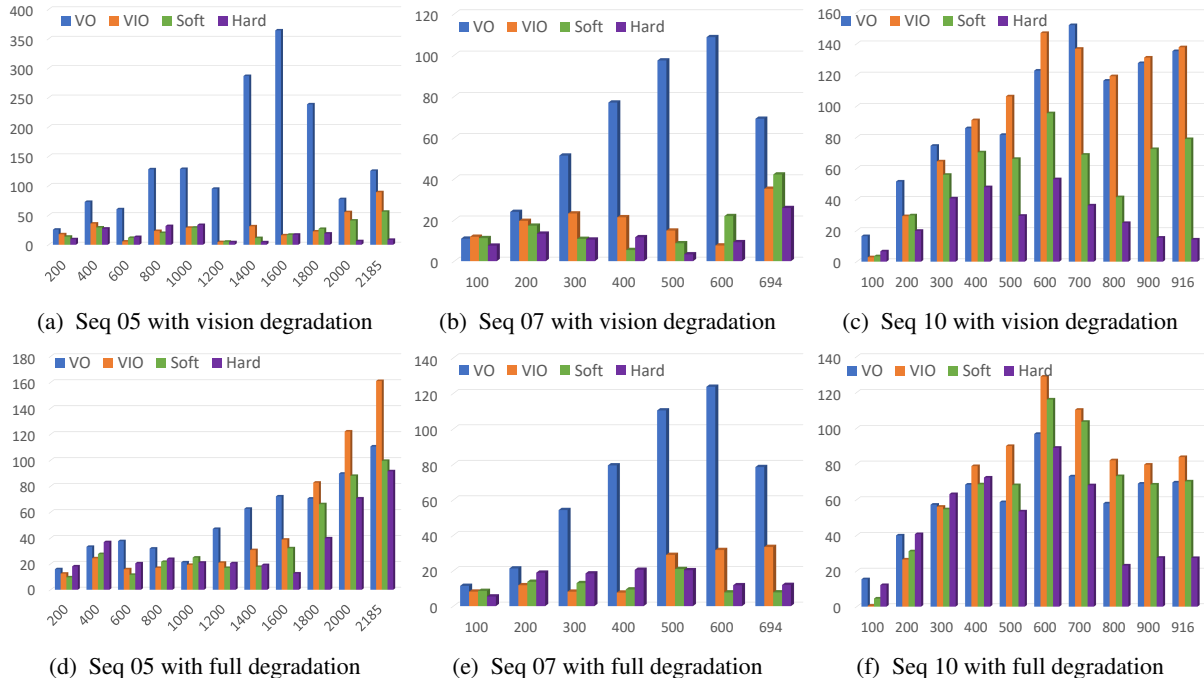

Figure 1: Global position errors (in meters, Y axis) on the KITTI dataset, over travelled distance (in meters, X axis).

synchronization (Figure 1, bottom row). That shows how a vanilla VIO fusion is unable to deal with these issues, to the point of underperforming compared to vision-only approaches. This result further corroborates the fact that in deep learning-based approaches explicitly learning the belief on the different components makes the estimation more robust, while stacking sensors without a sensible fusion strategy can lead to *catastrophic fusion*, similarly to traditional approaches. Catastrophic fusion happens when the single components of the system before fusion significantly outperform the overall system after fusion [6].

#### 4. Supplementary Video

The supplementary video shows an evaluation of soft fusion and hard fusion on Seq 05 of the KITTI dataset, with vision degradation (10% occlusion, 10% blur+noise, 10% missing data), compared with two deep VO and VIO baselines. The degraded images and corresponding soft/hard masks are shown in the top-left and bottom-left respectively. The trajectories from the four methods are shown on the right side.

#### References

[1] M. Burri, J. Nikolic, P. Gohl, T. Schneider, J. Rehder, S. Omari, M. W. Achtelik, and R. Siegwart. The euroc micro aerial vehicle datasets. *The International Journal of Robotics Research*, 2016. 1

[2] C. Chen, C. X. Lu, A. Markham, and N. Trigoni. Ionet: Learning to cure the curse of drift in inertial odometry. In *AAAI Conference on Artificial Intelligence (AAAI)*, 2018. 1

[3] P. Fischer, E. Ilg, H. Philip, C. Hazrbas, P. V. D. Smagt, D. Cremers, and T. Brox. FlowNet: Learning Optical Flow with Convolutional Networks. In *International Conference on Computer Vision, ICCV*, 2015. 1

[4] A. Geiger, P. Lenz, C. Stiller, and R. Urtasun. Vision meets robotics: The KITTI dataset. *The International Journal of Robotics Research*, 32(11):1231–1237, 2013. 1

[5] W. Maddern, G. Pascoe, C. Linegar, and P. Newman. 1 Year, 1000km: The Oxford RobotCar Dataset. *The International Journal of Robotics Research (IJRR)*, 36(1):3–15, 2016. 1

[6] J. R. Movellan and P. Mineiro. Robust sensor fusion: Analysis and application to audio visual speech recognition. *Machine Learning*, 32(2):85–100, 1998. 2

[7] B. Pfrommer, N. Sanket, K. Daniilidis, and J. Cleveland. Penncosyvio: A challenging visual inertial odometry benchmark. In *2017 IEEE International Conference on Robotics and Automation, ICRA 2017, Singapore, Singapore, May 29 - June 3, 2017*, pages 3847–3854, 2017. 1

[8] D. Schubert, T. Goll, N. Demmel, V. Usenko, J. Stückler, and D. Cremers. The TUM VI Benchmark for Evaluating Visual-Inertial Odometry. In *ICRA*, 2018. 1

[9] J. Shotton, B. Glocker, C. Zach, S. Izadi, A. Criminisi, and A. Fitzgibbon. Scene coordinate regression forests for camera relocalization in RGB-D images. In *CVPR*, pages 2930–2937, 2013. 1

### Visual Encoder

---

|                    |                                                          |
|--------------------|----------------------------------------------------------|
| [ input ]          | Two stacked images: $B \times 512 \times 256 \times 6$   |
| [ layer 1 ]        | Conv. $7^2$ , Stride $2^2$ , Padding 3, LeakyReLU activ. |
| [ layer 2 ]        | Conv. $5^2$ , Stride $2^2$ , Padding 2, LeakyReLU activ. |
| [ layer 3 ]        | Conv. $5^2$ , Stride $2^2$ , Padding 2, LeakyReLU activ. |
| [ layer 3.1 ]      | Conv. $3^2$ , Stride $1^2$ , Padding 1                   |
| [ layer 4 ]        | Conv. $3^2$ , Stride $2^2$ , Padding 2, LeakyReLU activ. |
| [ layer 4.1 ]      | Conv. $3^2$ , Stride $1^2$ , Padding 1                   |
| [ layer 5 ]        | Conv. $3^2$ , Stride $2^2$ , Padding 2, LeakyReLU activ. |
| [ layer 5.1 ]      | Conv. $3^2$ , Stride $1^2$ , Padding 1                   |
| [ layer 6 ]        | Conv. $3^2$ , Stride $2^2$ , Padding 1                   |
| [ layer 6 output ] | $B \times 4 \times 8 \times 1024$                        |
| [ layer 7 ]        | FC 256                                                   |
| [ output ]         | $B \times 256$                                           |

### Inertial Encoder

---

|             |                                                |
|-------------|------------------------------------------------|
| [ input ]   | IMU sequence: $B \times 10 \times 6$           |
| [ layer 1 ] | FC 128                                         |
| [ layer 2 ] | B-LSTM, 2-layers, hidden size 128, Dropout 0.2 |
| [ output ]  | $B \times 256$                                 |

### Direct Fusion Module

---

|            |                             |
|------------|-----------------------------|
| [ input ]  | $B \times (256 \oplus 256)$ |
| [ output ] | $B \times 512$              |

### Soft Fusion Module

---

|             |                                           |
|-------------|-------------------------------------------|
| [ input ]   | $B \times (256 \oplus 256)$               |
| [ layer 1 ] | FC 512 (input)                            |
| [ layer 2 ] | $[(\text{input}) \odot (\text{layer 1})]$ |
| [ output ]  | $B \times 512$                            |

### Hard Fusion Module

---

|             |                                           |
|-------------|-------------------------------------------|
| [ input ]   | $B \times (256 \oplus 256)$               |
| [ layer 1 ] | FC 1024, Sigmoid activ. (input)           |
| [ layer 2 ] | Gumbel-Softmax sampling, $512 \times 2$   |
| [ layer 2 ] | $[(\text{input}) \odot (\text{layer 2})]$ |
| [ output ]  | $B \times 512$                            |

### Pose Regressor

---

|               |                                                |
|---------------|------------------------------------------------|
| [ input ]     | $B \times 512$                                 |
| [ layer 1 ]   | B-LSTM, 2-layers, hidden size 512, Dropout 0.2 |
| [ layer 2 ]   | Dropout 0.2                                    |
| [ layer 3.1 ] | FC 3 (layer 2)                                 |
| [ layer 3.2 ] | FC 3 (layer 2)                                 |
| [ layer 4 ]   | $(\text{layer 3.1}) \oplus (\text{layer 3.2})$ |
| [ output ]    | $B \times 6$                                   |

Table 1: Implementation details for the proposed architecture.  $\oplus$  denotes a concatenation operation;  $\odot$  indicates an element-wise product between two tensors.

Table 2: Correspondences between the KITTI Odometry Number, the raw data file names and the corresponding number of sequences

| Odometry Nr. | Raw Data Filename     | Number of Sequences |
|--------------|-----------------------|---------------------|
| 00           | 2011_10_03_drive_0027 | 4390                |
| 01           | 2011_10_03_drive_0042 | 1173                |
| 02           | 2011_10_03_drive_0034 | 4485                |
| 03           | 2011_09_26_drive_0067 | Not available       |
| 04           | 2011_09_30_drive_0016 | 284                 |
| 05           | 2011_09_30_drive_0018 | 2750                |
| 06           | 2011_09_30_drive_0020 | 1091                |
| 07           | 2011_09_30_drive_0027 | 1111                |
| 08           | 2011_09_30_drive_0028 | 5149                |
| 09           | 2011_09_30_drive_0033 | 1599                |
| 10           | 2011_09_30_drive_0034 | 1215                |
